# Supplementary material
Source: PubMed Central journal article supplement (PMC5860846)
Supplement: DC171954SupplementaryData.pdf [file DC171954SupplementaryData.pdf]

SUPPLEMENTARY DATA

**Supplementary Table 1. Distribution of CKD Phenotypes in the U.S. Population with Diabetes by Time Period**

|                                               | <b>1988-1994 Population =13.2 million+</b>     | <b>1999-2002 Population=16.0 million</b>        | <b>2003-2006 Population=19.7 million</b>        | <b>2007-2010 Population=23.8 million</b>        |
|-----------------------------------------------|------------------------------------------------|-------------------------------------------------|-------------------------------------------------|-------------------------------------------------|
|                                               | <b>Population Estimate in millions(95% CI)</b> | <b>Population estimate in millions (95% CI)</b> | <b>Population estimate in millions (95% CI)</b> | <b>Population estimate in millions (95% CI)</b> |
| <b>eGFR ≥ 90 ml/min/1.73 m<sup>2</sup></b>    |                                                |                                                 |                                                 |                                                 |
| ACR < 30 mg/g                                 | 4.9 (4.2,5.5)                                  | 4.6 (3.9, 5.2)                                  | 6.2 (5.2, 7.2)                                  | 8.8 (7.6,10.0)                                  |
| ACR 30-299 mg/g                               | 1.2 (0.9,1.5)                                  | 1.9 (1.4, 2.5)                                  | 1.9 (1.5, 2.3)                                  | 1.9 (1.5, 2.3)                                  |
| ACR ≥300 mg/g                                 | 0.3 (0.1, 0.4)                                 | 0.4 (0.1, 0.6)                                  | 0.3 (0.4, 0.4)                                  | 0.2 (0.1, 0.3)                                  |
| <b>eGFR 60-89 ml/min/1.73 m<sup>2</sup></b>   |                                                |                                                 |                                                 |                                                 |
| ACR < 30 mg/g                                 | 3.4 (2.8, 4.0)                                 | 5.0 (4.3, 5.8)                                  | 5.8 (4.3, 7.3)                                  | 6.6 (5.8, 7.4)                                  |
| ACR 30-299 mg/g                               | 1.5 (1.2,1.7)                                  | 1.1 (0.9, 1.4)                                  | 1.7 (1.2, 2.2)                                  | 1.7 (1.1, 2.2)                                  |
| ACR ≥ 300 mg/g                                | 0.3 (0.2,0.4)                                  | 0.4 (0.2, 0.5)                                  | 0.3 (0.1, 0.5)                                  | 0.6 (0.5, 0.8)                                  |
| <b>eGFR &lt; 60 ml/min/1.73 m<sup>2</sup></b> |                                                |                                                 |                                                 |                                                 |
| ACR < 30 mg/g                                 | 0.9 (0.7,1.1)                                  | 1.3 (0.9, 1.8)                                  | 2.0 (1.5, 2.6)                                  | 2.4 (1.9, 2.9)                                  |
| ACR 30-299 mg/g                               | 0.6 (0.4,0.8)                                  | 0.7 (0.5, 0.9)                                  | 1.0 (0.7,1.4)                                   | 1.2 (1.0, 1.4)                                  |
| ACR ≥ 300 mg/g                                | 0.3 (0.2, 0.4)                                 | 0.6 (0.3, 0.8)                                  | 0.5 (0.3, 0.6)                                  | 0.4 (0.2, 0.7)                                  |

ACR = albumin-to-creatinine ratio; eGFR = estimated glomerular filtration rate(1); +Due to rounding errors in population estimates for each CKD phenotype during years 1988-1994, the sum of population estimates for each CKD phenotype overestimate the total population by 0.2 million

SUPPLEMENTARY DATA

**Supplementary Table 2. Prevalence of CKD phenotypes by time period in U.S. population with diabetes**

|                                                            | <b>1988-1994</b>                                    | <b>1999-2002</b>                                    | <b>2003-2006</b>                                    | <b>2007-2010</b>                                    |
|------------------------------------------------------------|-----------------------------------------------------|-----------------------------------------------------|-----------------------------------------------------|-----------------------------------------------------|
|                                                            | <b>% Population with Diabetes (sampled persons)</b> |
| <b>eGFR <math>\geq</math> 90 ml/min/1.73 m<sup>2</sup></b> |                                                     |                                                     |                                                     |                                                     |
| ACR < 30 mg/g                                              | 36.8 (657)                                          | 28.6 (296)                                          | 31.7 (332)                                          | 37.0 (579)                                          |
| ACR 30-299 mg/g                                            | 9.0 (182)                                           | 12.1 (125)                                          | 9.6 (99)                                            | 7.9 (159)                                           |
| ACR $\geq$ 300 mg/g                                        | 2.0 (46)                                            | 2.2 (23)                                            | 1.3 (24)                                            | 1.0 (29)                                            |
| <b>eGFR 60-89 ml/min/1.73 m<sup>2</sup></b>                |                                                     |                                                     |                                                     |                                                     |
| ACR < 30 mg/g                                              | 25.9 (427)                                          | 31.5 (301)                                          | 29.4 (315)                                          | 27.6 (482)                                          |
| ACR 30-299 mg/g                                            | 11.0 (181)                                          | 7.0 (91)                                            | 9.6 (125)                                           | 6.9 (134)                                           |
| ACR $\geq$ 300 mg/g                                        | 2.2 (63)                                            | 2.2 (34)                                            | 1.5 (17)                                            | 2.6 (55)                                            |
| <b>eGFR &lt; 60 ml/min/1.73 m<sup>2</sup></b>              |                                                     |                                                     |                                                     |                                                     |
| ACR < 30 mg/g                                              | 6.6 (63)                                            | 8.3 (95)                                            | 10.3 (131)                                          | 10.1 (191)                                          |
| ACR 30-299 mg/g                                            | 4.3 (83)                                            | 4.5 (55)                                            | 5.2 (78)                                            | 5.1 (116)                                           |
| ACR $\geq$ 300 mg/g                                        | 2.2 (60)                                            | 3.5 (47)                                            | 2.3 (39)                                            | 1.9 (36)                                            |

ACR = albumin-to-creatinine ratio; eGFR = estimated glomerular filtration rate(1);

SUPPLEMENTARY DATA

**Supplementary Table 3. Cox proportional hazard models for temporal differences in five-year death rates in U.S. adults with diabetes and estimated glomerular filtration rate <60 ml/min/1.73 m<sup>2</sup> and albumin-to-creatinine ratio <30 mg/g**

|           | Unadjusted        | Model 1           | Model 2           | Model 3           |
|-----------|-------------------|-------------------|-------------------|-------------------|
| 1988-1994 | Reference         | Reference         | Reference         | Reference         |
| 1999-2002 | 1.53 (0.75, 3.09) | 1.58 (0.79, 3.18) | 1.66 (0.81, 3.39) | 1.25 (0.55, 2.48) |
| 2003-2006 | 1.47 (0.75, 2.88) | 1.80 (0.94, 3.44) | 1.78 (0.85, 3.74) | 1.28 (0.47, 3.48) |

Model 1 – Adjusted for age, gender, and race; Model 2 - Model 1 + history of myocardial infarction, heart failure, hypertension, lung disease and cancer; Model 3 - Model 2 + use of angiotensin converting enzyme inhibitors, angiotensin receptor blockers and statin medications

**Supplementary Figure 1. Panel A (eGFR ≥ 90 ml/min/1.73 m<sup>2</sup>), B (eGFR 60-89 ml/min/1.73 m<sup>2</sup>), and C (eGFR < 60 ml/min/1.73 m<sup>2</sup>) are stacked plots which show the percentage of ACR subgroups within the eGFR group. eGFR = estimated glomerular filtration rate(1)**

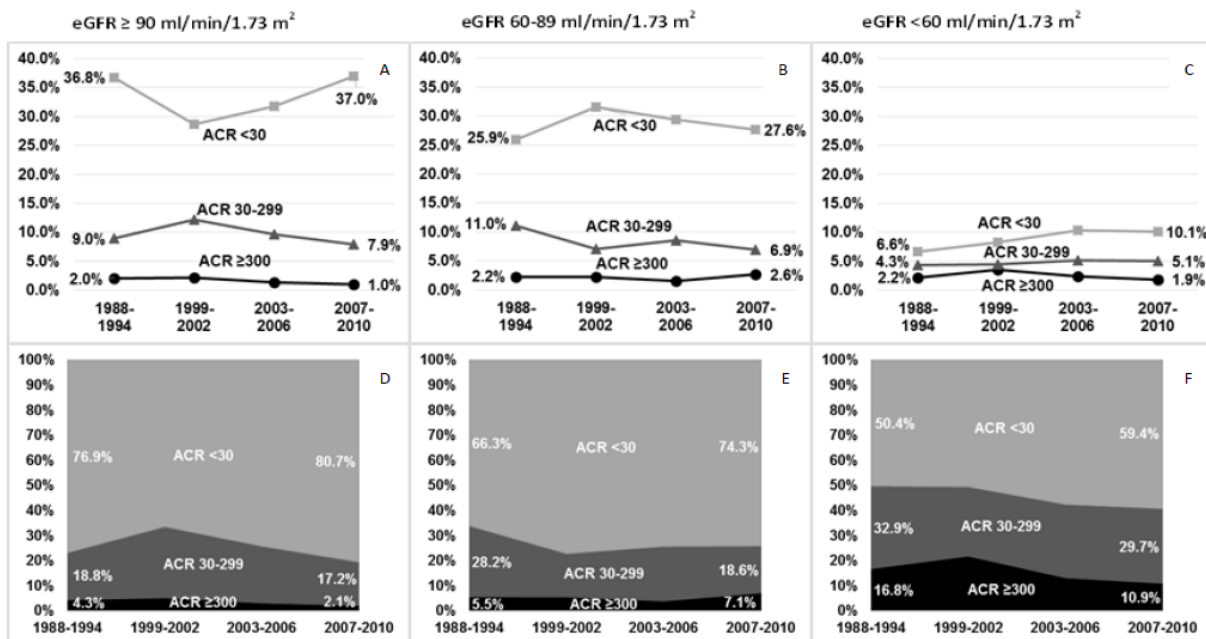

References

- Inker LA, Schmid CH, Tighiouart H, Eckfeldt JH, Feldman HI, Greene T, Kusek JW, Manzi J, Van Lente F, Zhang YL, Coresh J, Levey AS, CKD-EPI I. Estimating glomerular filtration rate from serum creatinine and cystatin C. N Engl J Med 2012 Jul 5;367(1):20-29
